# Supplementary material for: IFN-γ-response mediator GBP-1 represses human cell proliferation by inhibiting the Hippo signaling transcription factor TEAD
Source: PubMed Central journal article supplement (PMC6156764; doi:10.1042/bcj20180123), 2018-09-25
Supplement: BCJ-475-2955-s1.pdf [file BCJ-475-2955-s1.pdf]

## Supplementary Material

**IFN- $\gamma$ -response mediator GBP-1 represses human cell proliferation by inhibiting the Hippo signaling transcription factor TEAD**

### Supplementary Figure 1

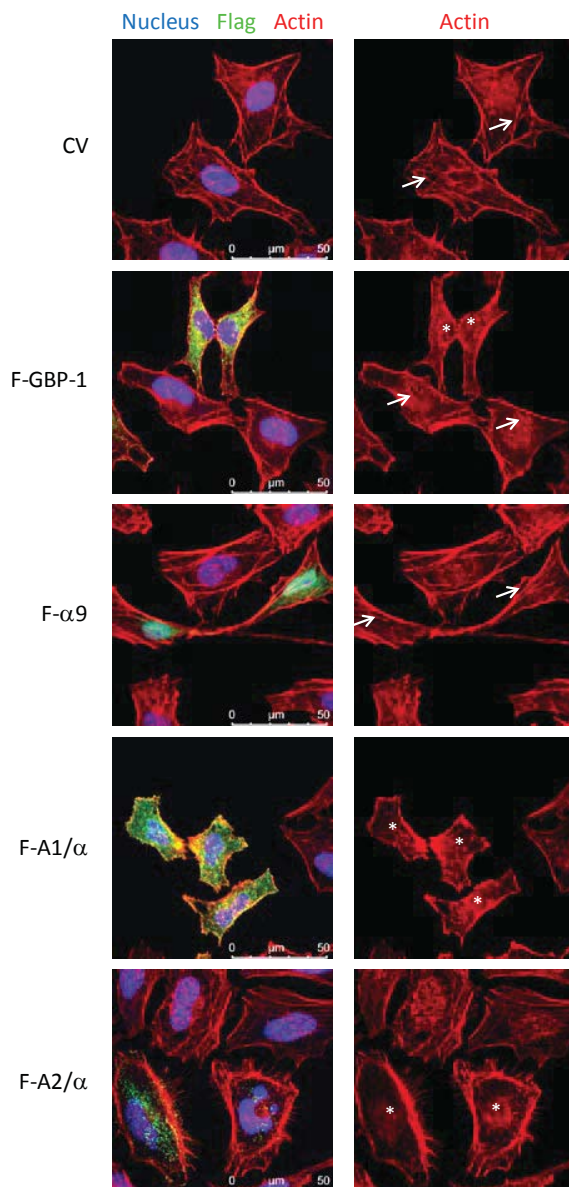

**Supplementary Figure 1. The  $\alpha 9$ -helix of GBP-1 does not influence the actin cytoskeleton architecture.** HeLa cells were transiently transfected with the indicated Flag-tagged expression plasmids or the plain vector (CV) as control. Transfected cells were detected using an anti-Flag antibody (Flag, green). The actin cytoskeleton was visualized using Phalloidin-AlexaFluor546 (red) and nuclei were counterstained with Draq5 (blue). Scale bars represent 50  $\mu$ m. Intact actin fibers are indicated by arrows and disturbed actin cytoskeleton by asterisks.

## Supplementary Figure 2

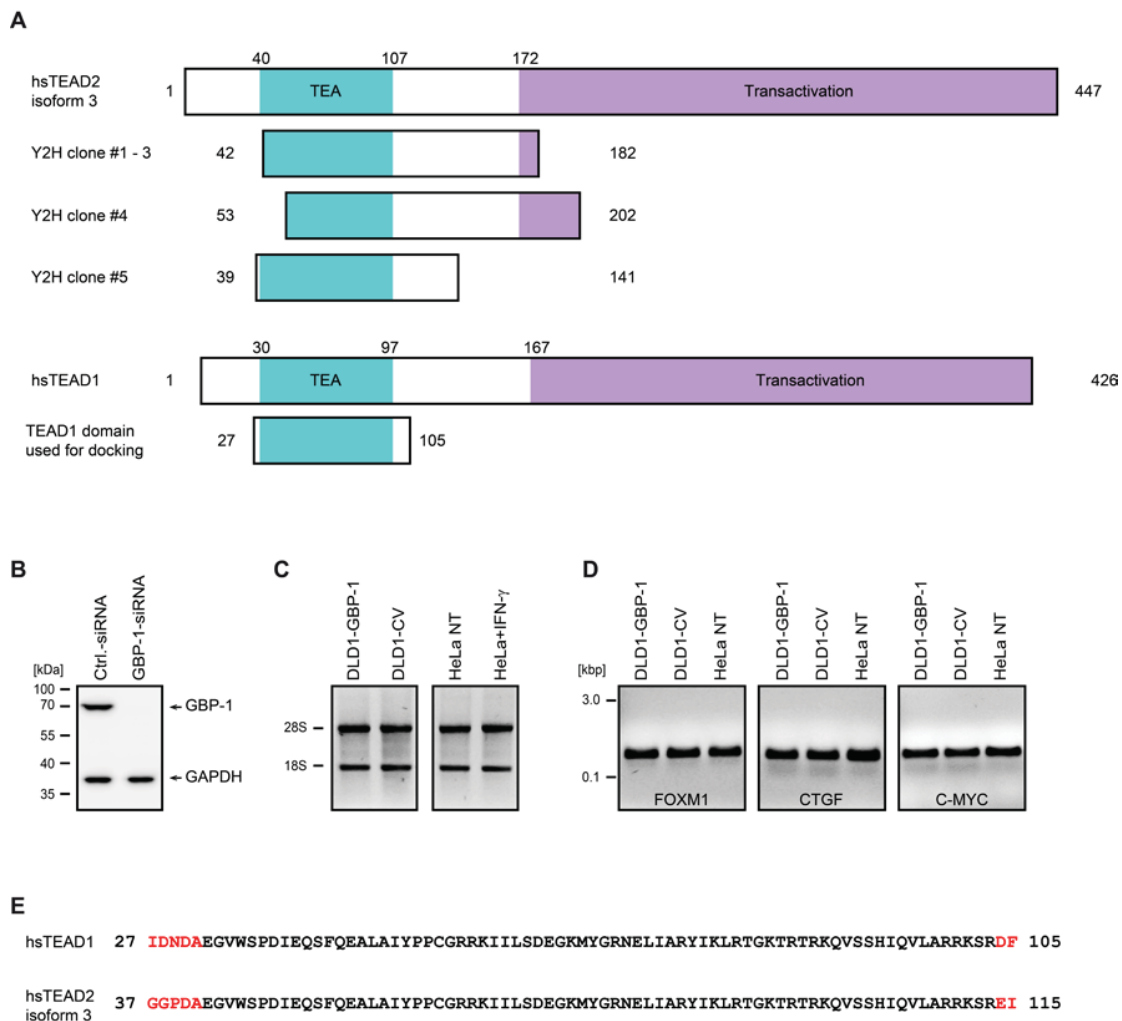

**Supplementary Figure 2.** (A) Domain architecture of TEAD fragments that interact with the GBP-1- $\alpha$ 9-helix. Five partly overlapping TEAD clones identified in the Y2H analysis are shown. Amino acid numbers correspond to human TEAD2 isoform 3 (NP\_003589.1), consisting of an N-terminal TEA domain that binds to DNA and a C-terminal transactivation domain that binds co-activators. Below, hsTEAD1 and its domain that was used for molecular docking analysis is depicted. (B) GBP-1 expression is inhibited by siRNA. GBP-1 expression in cell lysates used for the luciferase assay was analyzed by western blot. GBP-1 expression was inhibited in cells treated with a specific siRNA (siGBP) but not with the control siRNA (siCtrl). GAPDH staining confirmed the amount of protein analyzed was equal. (C) RNA integrity. RNA was isolated from DLD1-cells stably expressing GBP-1 (DLD1-GBP-1) or transfected with the empty vector (DLD1-CV) and from HeLa cells either unstimulated or stimulated with IFN- $\gamma$  and subjected to agarose gel electrophoresis. RNA was intact as indicated by 18 S and 28 S rRNA. (D) Primers were specific for TEAD target genes. Endpoint PCR products (after 40 cycles) showed for each of the different genes one specific band of the correct size in agarose-gel electrophoresis. (E) TEAD sequence alignment. TEAD1 (NP\_068780.2) residues 27-105 used in molecular docking analyses correspond to hsTEAD2 isoform 3 residues 37-115. Not identical residues are marked in red.

## Supplementary Table 1. Similarity Search

| Protein                                                              | Blast                                                | PattInProt                          |
|----------------------------------------------------------------------|------------------------------------------------------|-------------------------------------|
| GBP-1                                                                | VDHLFQK                                              | VDHLFQK                             |
| GBP-3                                                                | VDHLFQK                                              | VDHLFQK                             |
| serine/threonine-protein phosphatase 6 regulatory subunit 2          | V <sup>T</sup> H <sup>L</sup> FLFQK                  | V <sup>T</sup> H <sup>L</sup> FLFQK |
| ras-related protein Rab-24                                           | VDE <sup>L</sup> FLFQK                               | VDE <sup>L</sup> FLFQK              |
| potassium voltage-gated channel, subfamily H (eag-related), member 5 | VDH <sup>P</sup> V <sup>R</sup> K <sup>L</sup> FLFQK |                                     |
| heart muscle inducible nitric oxide synthase                         | -DHL <sup>Y</sup> QK                                 |                                     |
| sprouty-related, EVH1 domain-containing protein 1                    | -DHLFQ-                                              |                                     |
| teneurin-2                                                           | --HLFQK                                              |                                     |
| active breakpoint cluster region-related protein isoform f           | --HLFQK                                              |                                     |
| OCRL-1 gene                                                          | VDHLF--                                              |                                     |

Transcriptome-wide search of the first seven  $\alpha 9$  residues (376-382) was performed by Blast and PattInProt search. For the Blast search, all results are given. For the PattInProt search, only results with a maximum of one mismatch are listed because there are more than 100 results when the setting is changed to two mismatches. Changed residues are depicted in red.

## **Supplementary material and methods**

### **Immunofluorescence analysis of the actin cytoskeleton**

For immunofluorescence analysis of the actin cytoskeleton, HeLa cells were seeded in 4-well chamber slides (Nunc) at a cell density of  $2.5 \times 10^4$  cells. Twenty-four hours after seeding, cells were transfected with 1  $\mu$ g of plasmid per well using the calcium phosphate method. Cells were fixed with 4% buffered paraformaldehyde and permeabilized with 0.1% Triton X100 (both from Sigma-Aldrich) 48 h post-transfection. Transfected cells were detected using a polyclonal rabbit anti-Flag-tag antibody (1:500, Thermo Fisher Scientific, Rockford, IL USA). AlexaFluor 488-conjugated goat anti-rabbit IgG (1:500) was used as secondary antibody (Molecular Probes/Invitrogen). Actin was stained using fluorescently labeled phalloidin (Alexa Fluor<sup>®</sup> 546 Phalloidin, 1:70, Invitrogen/Molecular Probes) and nuclei were counterstained with Draq5 (1:800, Cell Signaling, Danvers, MA, USA). The coverslips were mounted with fluorescence mounting medium (Dako). Fluorescence was visualized using a confocal microscope, TCS SPE (Leica Microsystems, Wetzlar, Germany) using a 63x magnification. All images presented are single sections in the z-plane (1 airy unit).
